# Supplementary material for: Impact of pre-existing mental health diagnoses on development of post-COVID and related symptoms: a claims data-based cohort study
Source: PubMed Central journal article supplement (PMC10824734; doi:10.1038/s41598-024-52656-6), 2024-01-29
Supplement: 41598_2024_52656_MOESM1_ESM.pdf [file 41598_2024_52656_MOESM1_ESM.pdf]

## Supplementary Information

**Supplementary Table S1 (A-C) - All Hazard ratios (HR) with 95% confidence interval (CI) of secondary outcomes in dependence of predictor variables in the three study cohorts, sorted by the main clusters of symptoms of Post-COVID-19 condition**

A) Cluster of symptoms: "Fatigue"

|                                          |          | <b>Malaise and fatigue</b><br>HR (95% CI) | <b>Neurasthenia</b><br>HR (95% CI) | <b>Postviral fatigue syndrome</b><br>HR (95% CI) |
|------------------------------------------|----------|-------------------------------------------|------------------------------------|--------------------------------------------------|
| <b>Mental &amp; behavioural disorder</b> | Covid-19 | 1.43 (1.35, 1.51)                         | 2.21 (2.04, 2.39)                  | 1.72 (1.49, 1.98)                                |
|                                          | Controls | 1.71 (1.52, 1.93)                         | 2.77 (2.38, 3.23)                  | 1.96 (1.34, 2.86)                                |
|                                          | ORI      | 1.43 (1.2, 1.72)                          | 2.42 (1.89, 3.11)                  | 1.27 (0.65, 2.49)                                |
| <b>Anxiety</b>                           | Covid-19 | 1.26 (1.18, 1.36)                         | 1.57 (1.44, 1.72)                  | 1.25 (1.05, 1.48)                                |
|                                          | Controls | 1.39 (1.17, 1.64)                         | 2.18 (1.84, 2.59)                  | 1.48 (0.9, 2.41)                                 |
|                                          | ORI      | 1.53 (1.24, 1.89)                         | 1.37 (1.05, 1.78)                  | 1.28 (0.59, 2.8)                                 |
| <b>Depression</b>                        | Covid-19 | 1.42 (1.34, 1.5)                          | 1.91 (1.77, 2.05)                  | 1.79 (1.56, 2.05)                                |
|                                          | Controls | 1.59 (1.4, 1.81)                          | 2.15 (1.87, 2.49)                  | 2.06 (1.42, 2.97)                                |
|                                          | ORI      | 1.18 (0.98, 1.43)                         | 1.62 (1.3, 2.01)                   | 1.51 (0.79, 2.9)                                 |
| <b>Somatoform disorder</b>               | Covid-19 | 1.31 (1.24, 1.38)                         | 1.64 (1.53, 1.77)                  | 1.44 (1.26, 1.65)                                |
|                                          | Controls | 1.54 (1.36, 1.75)                         | 2.02 (1.75, 2.33)                  | 1.88 (1.29, 2.72)                                |
|                                          | ORI      | 1.47 (1.23, 1.76)                         | 1.7 (1.37, 2.1)                    | 1.78 (0.94, 3.37)                                |
| <b>Adjustment disorder</b>               | Covid-19 | 1.36 (1.29, 1.45)                         | 1.83 (1.71, 1.97)                  | 1.6 (1.39, 1.83)                                 |
|                                          | Controls | 1.43 (1.25, 1.65)                         | 2.34 (2.02, 2.72)                  | 2.11 (1.42, 3.13)                                |
|                                          | ORI      | 1.27 (1.05, 1.53)                         | 1.89 (1.52, 2.34)                  | 1.75 (0.91, 3.35)                                |
| <b>Diabetes</b>                          | Covid-19 | 0.90 (0.82, 1.00)                         | 0.76 (0.66, 0.87)                  | 0.76 (0.6, 0.96)                                 |
|                                          | Controls | 1.04 (0.88, 1.23)                         | 0.57 (0.45, 0.73)                  | 0.85 (0.52, 1.39)                                |
|                                          | ORI      | 0.65 (0.45, 0.95)                         | 0.78 (0.52, 1.18)                  | 0.9 (0.32, 2.55)                                 |
| <b>Asthma</b>                            | Covid-19 | 1.05 (0.97, 1.13)                         | 1.13 (1.02, 1.25)                  | 1.38 (1.16, 1.64)                                |
|                                          | Controls | 1.03 (0.85, 1.26)                         | 1.3 (1.05, 1.61)                   | 1.71 (1.03, 2.82)                                |
|                                          | ORI      | 0.89 (0.69, 1.16)                         | 0.85 (0.62, 1.18)                  | 0.48 (0.15, 1.56)                                |
| <b>Obesity</b>                           | Covid-19 | 0.98 (0.91, 1.05)                         | 1.11 (1.02, 1.21)                  | 1.18 (1.01, 1.38)                                |
|                                          | Controls | 0.99 (0.85, 1.16)                         | 0.94 (0.78, 1.14)                  | 1.13 (0.72, 1.77)                                |
|                                          | ORI      | 0.81 (0.63, 1.05)                         | 1.13 (0.86, 1.49)                  | 1.39 (0.66, 2.95)                                |
| <b>Hypertension</b>                      | Covid-19 | 0.93 (0.86, 0.99)                         | 0.95 (0.87, 1.04)                  | 1.03 (0.87, 1.21)                                |
|                                          | Controls | 1.07 (0.95-1.22)                          | 0.82 (0.71, 0.96)                  | 0.88 (0.61, 1.29)                                |
|                                          | ORI      | 0.85 (0.69, 1.05)                         | 1.04 (0.81, 1.32)                  | 1.77 (0.93, 3.38)                                |

B) Cluster of symptoms: „Respiratory“

|                                          |          | <b>Dyspnoea</b>   | <b>Cough</b>      | <b>Pulmonary embolism</b> |
|------------------------------------------|----------|-------------------|-------------------|---------------------------|
|                                          |          | HR (95% CI)       | HR (95% CI)       | HR (95% CI)               |
| <b>Mental &amp; behavioural disorder</b> | Covid-19 | 1.31 (1.23, 1.39) | 1.35 (1.26, 1.45) | 1.08 (0.92, 1.27)         |
|                                          | Controls | 1.55 (1.35, 1.79) | 1.46 (1.19, 1.79) | 0.99 (0.73, 1.34)         |
|                                          | ORI      | 1.28 (1, 1.65)    | 1.26 (1, 1.58)    | 1.36 (0.71, 2.6)          |
| <b>Anxiety</b>                           | Covid-19 | 1.14 (1.06, 1.24) | 1.26 (1.14, 1.39) | 0.98 (0.78, 1.24)         |
|                                          | Controls | 1.21 (0.99, 1.49) | 1.18 (0.86, 1.61) | 0.89 (0.52, 1.51)         |
|                                          | ORI      | 1.37 (1.02, 1.84) | 1.09 (0.81, 1.48) | 1.83 (0.89, 3.73)         |
| <b>Depression</b>                        | Covid-19 | 1.22 (1.14, 1.3)  | 1.32 (1.22, 1.43) | 1.08 (0.91, 1.29)         |
|                                          | Controls | 1.56 (1.34, 1.8)  | 1.38 (1.1, 1.73)  | 1.2 (0.86, 1.68)          |
|                                          | ORI      | 1.21 (0.94, 1.56) | 1.08 (0.84, 1.38) | 1.3 (0.69, 2.46)          |
| <b>Somatoform disorder</b>               | Covid-19 | 1.32 (1.24, 1.4)  | 1.31 (1.22, 1.41) | 1.09 (0.91, 1.29)         |
|                                          | Controls | 1.67 (1.44, 1.93) | 1.29 (1.03, 1.63) | 1.41 (1.01, 1.97)         |
|                                          | ORI      | 1.18 (0.92, 1.52) | 1.28 (1.01, 1.61) | 1.56 (0.84, 2.91)         |
| <b>Adjustment disorder</b>               | Covid-19 | 1.23 (1.15, 1.31) | 1.25 (1.15, 1.35) | 1.15 (0.95, 1.39)         |
|                                          | Controls | 1.24 (1.04, 1.48) | 1.37 (1.07, 1.76) | 1.07 (0.69, 1.65)         |
|                                          | ORI      | 1.07 (0.82, 1.4)  | 1.17 (0.92, 1.5)  | 1.25 (0.63, 2.5)          |
| <b>Diabetes</b>                          | Covid-19 | 0.97 (0.89, 1.06) | 0.9 (0.79, 1.03)  | 0.9 (0.73, 1.12)          |
|                                          | Controls | 1.4 (1.2, 1.64)   | 1.14 (0.86, 1.51) | 0.73 (0.5, 1.06)          |
|                                          | ORI      | 1.05 (0.74, 1.48) | 1.16 (0.79, 1.69) | 0.62 (0.24, 1.58)         |
| <b>Asthma</b>                            | Covid-19 | 1.46 (1.35, 1.58) | 1.31 (1.19, 1.44) | 1.43 (1.16, 1.77)         |
|                                          | Controls | 2.02 (1.69, 2.43) | 2.34 (1.81, 3.03) | 1.89 (1.24, 2.87)         |
|                                          | ORI      | 0.99 (0.7, 1.39)  | 0.89 (0.64, 1.24) | 1.23 (0.55, 2.79)         |
| <b>Obesity</b>                           | Covid-19 | 1.44 (1.34, 1.53) | 1.24 (1.14, 1.35) | 1.62 (1.36, 1.91)         |
|                                          | Controls | 1.89 (1.63, 2.2)  | 1.15 (0.88, 1.5)  | 1.92 (1.38, 2.66)         |
|                                          | ORI      | 1.36 (1.03, 1.81) | 1.01 (0.75, 1.38) | 1.34 (0.66, 2.74)         |
| <b>Hypertension</b>                      | Covid-19 | 1.12 (1.04, 1.20) | 1.13 (1.04, 1.24) | 1.20 (1.00, 1.45)         |
|                                          | Controls | 2.11 (1.81, 2.46) | 1.57 (1.27, 1.94) | 0.89 (0.65, 1.23)         |
|                                          | ORI      | 1.51 (1.18, 1.93) | 1.10 (0.85, 1.43) | 2.63 (1.23, 4.54)         |

C) Cluster of symptoms „Cognitive disorder / Neurological”

|                                          |          | <b>Mental disorder due to brain dysfunction and to physical disease</b><br>HR (95% CI) | <b>Mild cognitive disorder</b><br>HR (95% CI) | <b>Myalgia</b><br>HR (95% CI) | <b>Disturbances of smell and taste</b><br>HR (95% CI) |
|------------------------------------------|----------|----------------------------------------------------------------------------------------|-----------------------------------------------|-------------------------------|-------------------------------------------------------|
| <b>Mental &amp; behavioural disorder</b> | Covid-19 | 1.65 (1.43, 1.89)                                                                      | 1.87 (1.49, 2.35)                             | 1.11 (0.72, 1.71)             | 1.38 (1.22, 1.56)                                     |
|                                          | Controls | 1.64 (1.38, 1.94)                                                                      | 1.46 (1.17, 1.83)                             | 1.98 (1.06, 3.67)             | 1.49 (0.95, 2.31)                                     |
|                                          | ORI      | 1.21 (0.71, 2.08)                                                                      | 1.4 (0.67, 2.96)                              | 0.38 (0.09, 1.51)             | 0.62 (0.35, 1.1)                                      |
| <b>Anxiety</b>                           | Covid-19 | 1.48 (1.26, 1.73)                                                                      | 1.81 (1.42, 2.31)                             | 1.14 (0.63, 2.08)             | 1.27 (1.08, 1.49)                                     |
|                                          | Controls | 1.6 (1.29, 2)                                                                          | 1.37 (1, 1.87)                                | 1.28 (0.54, 3.04)             | 1.08 (0.54, 2.16)                                     |
|                                          | ORI      | 1.13 (0.59, 2.18)                                                                      | 1.87 (0.87, 4.04)                             | 0 (0, Inf)                    | 0.96 (0.43, 2.15)                                     |
| <b>Depression</b>                        | Covid-19 | 1.65 (1.46, 1.88)                                                                      | 2.08 (1.69, 2.56)                             | 1.1 (0.68, 1.79)              | 1.24 (1.09, 1.42)                                     |
|                                          | Controls | 1.63 (1.38, 1.93)                                                                      | 1.52 (1.21, 1.91)                             | 1.36 (0.71, 2.61)             | 1.45 (0.89, 2.36)                                     |
|                                          | ORI      | 1.69 (1.02, 2.81)                                                                      | 2.03 (1.02, 4.03)                             | 0 (0, Inf)                    | 0.83 (0.42, 1.64)                                     |
| <b>Somatoform disorder</b>               | Covid-19 | 1.36 (1.19, 1.55)                                                                      | 1.5 (1.22, 1.85)                              | 1.58 (1.02, 2.47)             | 1.39 (1.23, 1.58)                                     |
|                                          | Controls | 1.38 (1.15, 1.64)                                                                      | 1.35 (1.06, 1.71)                             | 1.51 (0.8, 2.87)              | 1.15 (0.69, 1.91)                                     |
|                                          | ORI      | 0.95 (0.55, 1.64)                                                                      | 1.1 (0.54, 2.25)                              | 1.15 (0.29, 4.61)             | 0.98 (0.52, 1.83)                                     |
| <b>Adjustment disorder</b>               | Covid-19 | 1.4 (1.21, 1.62)                                                                       | 1.67 (1.33, 2.09)                             | 0.82 (0.48, 1.41)             | 1.44 (1.26, 1.64)                                     |
|                                          | Controls | 1.75 (1.44, 2.14)                                                                      | 1.68 (1.28, 2.2)                              | 1.11 (0.51, 2.39)             | 1.62 (0.97, 2.72)                                     |
|                                          | ORI      | 0.98 (0.53, 1.81)                                                                      | 1.05 (0.47, 2.33)                             | 0 (0, Inf)                    | 0.78 (0.39, 1.58)                                     |
| <b>Diabetes</b>                          | Covid-19 | 1.17 (1.02, 1.34)                                                                      | 1.09 (0.86, 1.39)                             | 0.89 (0.43, 1.83)             | 0.62 (0.47, 0.8)                                      |
|                                          | Controls | 1.25 (1.05, 1.48)                                                                      | 1.14 (0.9, 1.45)                              | 1 (0.45, 2.21)                | 0.97 (0.51, 1.84)                                     |
|                                          | ORI      | 1.44 (0.83, 2.48)                                                                      | 1.32 (0.61, 2.85)                             | 0.98 (0.12, 7.93)             | 0.74 (0.23, 2.39)                                     |
| <b>Asthma</b>                            | Covid-19 | 1.1 (0.91, 1.34)                                                                       | 1.44 (1.1, 1.89)                              | 0.72 (0.35, 1.5)              | 0.96 (0.8, 1.15)                                      |
|                                          | Controls | 0.98 (0.74, 1.31)                                                                      | 1.06 (0.73, 1.52)                             | 3.58 (1.85, 6.95)             | 1.95 (1.08, 3.54)                                     |
|                                          | ORI      | 1.19 (0.61, 2.36)                                                                      | 0.97 (0.37, 2.51)                             | 1.71 (0.35, 8.25)             | 1.87 (0.95, 3.68)                                     |
| <b>Obesity</b>                           | Covid-19 | 1.14 (0.98, 1.32)                                                                      | 1.13 (0.9, 1.43)                              | 1.34 (0.82, 2.21)             | 0.98 (0.84, 1.14)                                     |
|                                          | Controls | 1.23 (1.01, 1.49)                                                                      | 1.37 (1.07, 1.76)                             | 0.83 (0.37, 1.88)             | 1.19 (0.68, 2.09)                                     |
|                                          | ORI      | 1.4 (0.79, 2.48)                                                                       | 1.66 (0.79, 3.48)                             | 0.58 (0.07, 4.66)             | 1.6 (0.81, 3.14)                                      |
| <b>Hypertension</b>                      | Covid-19 | 1.37 (1.17, 1.60)                                                                      | 1.23 (0.97, 1.57)                             | 1.05 (0.63, 1.74)             | 0.95 (0.81, 1.12)                                     |
|                                          | Controls | 1.37 (1.12, 1.67)                                                                      | 1.42 (1.09, 1.86)                             | 0.77 (0.40, 1.49)             | 1.22 (0.78, 1.93)                                     |
|                                          | ORI      | 1.08 (0.65, 1.82)                                                                      | 1.33 (0.66, 2.69)                             | 0.27 (0.03, 2.22)             | 0.73 (0.35, 1.52)                                     |
